# Supplementary material for: Rooted in therapeutics: comprehensive analyses of Cannabis sativa root extracts reveals potent antioxidant, anti-inflammatory, and bactericidal properties
Source: Front Pharmacol. 2024 Sep 16;15:1465136. doi: 10.3389/fphar.2024.1465136 (PMC11440120; doi:10.3389/fphar.2024.1465136)
Supplement: Supplementary file 2 [file DataSheet2.xlsx]

## Sheet: raw_EtOH extract_POS
Retention Time (RT)	m/z detected	Potential Identity	Area under the curve		QTOF (100 - 1250 m/z)
26.4977	282.271	Dodemorph	6714.39
5.839	216.123	2-Amino-9,10-epoxy-8-oxodecanoic acid	3589.36
5.839	169.132	Pyridoxamine	3277.56
25.965	256.27		3033.41
5.839	233.154	Boc-Asn	2670.2
1.47917	121.055	Cumene	2600.17
6.13483	284.234	Levallorphan	2318.64
10.1705	284.128	Guanosine	2205.01
6.10533	382.309	Cannabisativine	2189.33
5.81933	395.216	Bixin	1603.08
10.5162	314.143	Kresoxim-methyl	1535.77
22.9857	228.238		1526.69
13.6238	625.276	Cannabisin D	1521.29
5.79967	359.198	Cannabidiolic acid	1449.93
1.47917	180.14	Mexiletine	1320.52
36.0868	234.967	2-Iodophenol methyl ether	1217.57
35.5638	219.056	2-Hydroxy-6-oxo-6-phenylhexa-2,4-dienoate	1175.57
23.7257	254.252	(-)-Solenopsin A	1165.91
6.08583	200.135	gamma-Glutamyl-beta-aminopropiononitrile	1147.23
35.5638	141.99	Carbamoyl phosphate	1035.34
22.374	149.028	trans-Cinnamate	1027
2.594	202.111	Heteropyrithiamine	1000.25
35.6528	153.012	Xanthine	963.851
2.57433	155.12	(-)-Menthone	957.421
16.83	376.269	Icaceine	956.053
5.80933	377.283	9-cis-10'-Apo-beta-carotenal	877.343
24.5937	280.267		834.046
7.833	364.306	Aurachin D	832.375
6.04667	343.205	Compound IV	817.288
5.839	146.055	2-Oxoglutaramate	807.019
20.9535	296.268		804.007
21.6245	496.359		779.998
28.53	284.234	Levallorphan	763.483
35.1493	122.095	1-Phenylethylamine	752.212
5.81933	311.174	Sinapine	728.37		UV (280-360nm)
11.8578	625.276	Cannabisin F	723.224
26.4878	563.556		720.99
1.47917	232.157	O-Butanoylcarnitine	715.283
35.5147	139.02	Salicylate	704.418
5.4245	380.306	Sphingosine 1-phosphate	695.843
4.16217	202.111	Heteropyrithiamine	658.324
35.6035	236.966	Methazolamide	655.083
6.125	154.157	N-Guanylhistamine	649.025
4.59583	270.266	Capsi-amide	639.335
1.42	165.079	Phenylpyruvate	637.931
0.917167	155.989	4-Nitrocatechol	634.881
24.2388	736.565	1-Hexadecylthio-2-hexadecanoylamino-1,2-dideoxy-sn-glycero-3-phosphocholine	633.435
4.172	155.12	(+)-Isomenthone	628.813
3.0775	345.171	Melibiitol	613.493
20.9535	279.256	(6Z,9Z,12Z)-Octadecatrienoic acid	590.03
3.58983	232.157	O-Butanoylcarnitine	585.643
1.1835	104.106	4-Aminobutanoate	563.284
0.306333	197.019	D-Gluconic acid	562.138
4.00483	188.07	2-(Acetamidomethylene)succinate	559.664
2.41633	180.147	Mexiletine	551.866
4.86233	188.07	2-(Acetamidomethylene)succinate	548.997
17.7678	295.194	(9Z)-(13S)-12,13-Epoxyoctadeca-9,11-dienoic acid	547.005
24.1695	780.562		545.035
2.57433	219.135	N-Acetylserotonin	543.716
8.18767	564.372		536.875
8.474	608.417		529.815
36.1462	291.92		529.729
3.363	186.111	N-Hydroxy-4-aminobiphenyl	522.204
13.6238	625.337	Caribenolide I	505.417
24.2978	692.519		493.587
26.8722	270.289	Capsi-amide	491.061
13.6142	625.216	Cannabisin G	488.726
8.1975	547.352	3-O-alpha-Mycarosylerythronolide B	488.709
26.4977	265.27		485.345
1.41017	328.189	(S)-Scoulerine	481.402
7.90167	503.314	Kolanone	472.591
7.90167	520.346	Terpendole C	456.084
5.81933	341.191	N2,N5-Dibenzoyl-L-ornithine	453.066
20.579	520.357		450.654
11.8578	488.19	Myxothiazol A	448.215
1.41017	218.148	O-Propanoylcarnitine	445.845
7.57617	459.307	Prednisolone tebutate	443.836
6.05633	295.194	(9Z)-(13S)-12,13-Epoxyoctadeca-9,11-dienoic acid	443.165
3.78767	329.171	Steryl sulfate	436.78
14.789	219.056	2-Hydroxy-6-oxo-6-phenylhexa-2,4-dienoate	433.287
24.1202	824.598		423.185
4.1425	146.055	2-Oxoglutaramate	419.953
8.474	591.377		402.244
10.1803	147.044	2-Oxoglutarate	401.484
24.0217	242.261		399.949
7.9115	541.302	Condurangogenin C	397.687
20.4708	279.256	(6Z,9Z,12Z)-Octadecatrienoic acid	392.628
3.62917	365.211	Tetrahydrocortisone	386.784
24.3667	648.487		386.525
8.74033	652.448		386.062
24.061	868.645		365.47
7.58583	497.351	1-Palmitoylglycerophosphocholine	364.621
4.15217	219.135	N-Acetylserotonin	363.537
4.438	186.111	N-Hydroxy-4-aminobiphenyl	356.37
24.6035	263.249	Cernuine	352.517
6.115	225.207	L-(+)-Anaferine	352.442
7.2005	415.278	Tentoxin	349.115
15.4098	214.263		341.157
24.5643	227.135	Carnosine	336.223
16.515	309.189	Ubenimex	331.31
24.13	824.654		326.471
8.1975	585.298	Bilirubin	322.985
24.2388	736.617	1-Hexadecylthio-2-hexadecanoylamino-1,2-dideoxy-sn-glycero-3-phosphocholine	321.719
4.11283	268.249	Allopumiliotoxin 267A	321.151
6.08583	130.053	L-Pipecolate	320.726
16.1592	316.308	Panamine	317.355
7.58583	481.298	20-Hydroxyecdysone	310.127
35.4755	199.034	3-(3,4-Dihydroxyphenyl)lactate	309.406
24.426	604.462		301.973
10.5063	177.063	Ascorbate	296.818
8.95733	696.472	Mycinamicin IV	295.657
13.9495	548.36		294.744
24.2978	692.57	Tris(2,3-dibromopropyl) phosphate	293.383
4.8525	146.055	2-Oxoglutaramate	292.009
25.1363	268.249	Allopumiliotoxin 267A	290.033
7.56633	476.311	Netilmicin	289.713
20.0857	263.249	Cernuine	287.544
24.6432	662.46	Pavoninin 1	287.522
19.395	280.267		284.104
21.7925	277.238	3beta-Hydroxysteroid	283.987
7.90167	525.313		276.384
17.1952	177.082	Ascorbate	276.384
31.1537	663.469		274.6
4.369	345.162	Melibiitol	269.757
6.115	382.375		269.453
26.5073	247.25	Estrane	264.458
24.0023	912.682		264.162
7.0135	170.14	N(pi)-Methyl-L-histidine	263.139
9.1745	300.128	D-4'-Phosphopantothenate	258.041
16.0702	343.223	Compound IV	257.188
4.63517	329.206	Steryl sulfate	256.932
20.9535	251.244	Phlegmarine	253.706
21.6048	496.402		251.509
6.7965	409.207	Palmitoylglycerone phosphate	249.574
20.5298	221.13	5-Hydroxy-L-tryptophan	248.709
35.4855	154.157	N-Guanylhistamine	248.019
4.66483	365.202	N-Acetylmuramoyl-Ala	247.56
8.474	629.348	Gambogic acid	243.832
4.35917	381.203	Fludrocortisone	241.724
24.6628	618.459		241.597
35.4755	297.994	Hydrochlorothiazide	238.445
1.42	107.049	Aromatic aldehyde	236.151
7.84267	208.188	Luciduline	231.375
19.6808	277.238	3beta-Hydroxysteroid	228.73
24.4755	560.459		227.739
28.0465	284.234	Levallorphan	224.5
13.5057	200.169	Diethylcarbamazine	222.687
6.16433	121.071	Phenylacetaldehyde	221.289
12.0948	492.207	Demethylalangiside	220.934
6.125	198.148	L-Metanephrine	219.134
8.17783	569.348	Protoporphyrinogen IX	218.957
6.09567	264.215	Tramadol	218.264
1.22317	248.118	Linamarin	217.023
22.3642	301.16	Testolactone	216.169
6.33217	349.2	Gibberellin A1	215.687
1.48917	270.289	Capsi-amide	215.417
24.0512	868.602		212.717
6.78667	371.246	6-Keto-prostaglandin F1alpha	212.453
8.75017	635.407	Soyasapogenol B 3-O-D-glucuronide	211.724
20.9535	318.264	Hexocyclium	209.742
17.7678	221.138	5-Hydroxy-L-tryptophan	205.436
35.4855	158.02	2-Aminomuconate	205.377
6.96383	188.07	2-(Acetamidomethylene)succinate	200.284
7.82317	250.195	Lophocerine	199.181
26.4878	563.613		197.272
30.6403	338.364		194.269
8.2075	268.257	Allopumiliotoxin 267A	194.152
17.9452	167.08	D-Xylonate	191.756
7.19067	437.253	Stearoylglycerone phosphate	188.473
7.27017	423.253	Blasticidin S	188.196
11.5425	198.148	L-Metanephrine	187.185
7.24033	266.232	UH-301	184.782
23.9525	956.686		181.906
6.10533	157.139	(-)-Menthol	177.739
11.5425	170.14	N(pi)-Methyl-L-histidine	177.352
7.18083	453.199	3'-Demethylstaurosporine	175.92
35.4755	316.007	Efavirenz	175.425
28.7665	310.33		174.751
8.474	613.356	Mancinellin	174.698
25.965	297.301	Phytol	172.853
11.3643	328.189	(S)-Scoulerine	172.143
25.6095	256.27		170.368
8.41467	172.134	Gabapentin	168.769
6.401	341.191	N2,N5-Dibenzoyl-L-ornithine	168.096
24.6827	574.416		168.038
19.4642	284.234	Levallorphan	167.731
17.4717	242.261		167.68
35.4558	182.041	L-Tyrosine	164.162
4.32983	363.207	Cortisol	163.796
7.2105	432.3	Peimine	163.511
1.41017	262.143	Phenindamine	163.445
2.80167	166.125	L-Phenylalanine	162.335
24.5152	242.261		162.22
13.6338	325.111	Sterigmatocystin	161.942
35.505	111.035	Catechol	160.493
6.98367	453.209	3'-Demethylstaurosporine	159.471
13.4563	565.268	Aerobactin	158.494
17.7678	239.139	Felbamate	157.765
8.5235	608.465		157.324
20.5987	235.182	Benzoylagmatine	154.39
13.6142	462.215	Bitolterol	151.812
7.92133	503.369	GW 7647	150.333
8.7305	673.376		148.674
8.7305	657.389	Enalkiren	148.434
4.438	157.139	(-)-Menthol	147.055
19.4048	332.365		145.053
15.1335	200.258		144.197
24.5643	389.284	2alpha-Methyl-17beta-[(tetrahydro-2H-pyran-2-yl)oxy]-5alpha-androstan-3-one	143.977
35.406	165.079	Phenylpyruvate	142.594
4.34917	297.301	Phytol	140.714
16.0702	171.164	2-Undecanone	140.174
27.3068	270.289	Capsi-amide	139.174
7.00333	437.263	Stearoylglycerone phosphate	138.579
4.872	349.155	Gibberellin A1	136.604
6.55917	393.237	Betamethasone	135.701
16.8593	318.264	Hexocyclium	135.529
35.4755	122.55		135.111
24.5447	429.297	Hydroxyprogesterone caproate	134.844
10.1803	121.055	Phenylacetaldehyde	134.061
19.2965	107.049	Aromatic aldehyde	132.779
20.5298	277.19	p-Coumaroylagmatine	131.119
7.44733	261.196	Oxymetazoline	130.837
4.823	380.306	Aurachin B	128.69
24.4358	517.37	Fusidic acid	128.659
6.14467	126.1	5-Methylcytosine	127.261
11.8185	643.323	Piperazine citrate	126.769
17.1755	228.238		125.935
8.099	282.271	Dodemorph	125.139
20.1947	320.261	Homocapsaicin	125.111
6.184	382.28	Cannabisativine	124.66
16.82	398.261	Echimidine	123.878
15.6758	230.252	2S-Amino-tridecanoic acid	120.348
24.6332	707.509		117.986
20.4708	318.255	Hexocyclium	116.814
4.428	215.142	Methyl 2-diazoacetamidohexonate	114.891
35.1197	261.196	Oxymetazoline	114.583
21.3778	296.268		114.375
11.8185	462.215	Bitolterol	111.79
24.3963	403.259	Erythronolide B	111.204
7.85233	266.232	UH-301	110.11
25.3137	439.37	Demethylphylloquinol	109.143
19.3852	263.249	Cernuine	108.833
7.84267	541.347	Condurangogenin C	108.484
7.44733	244.155	Biotin amide	107.383
17.5997	304.308	Fenpropimorph	103.527
17.7872	251.175	N-Caffeoylputrescine	101.799
4.86233	144.085	2-Naphthylamine	101.349
35.4953	102.033	1-Aminocyclopropane-1-carboxylate	101.109
4.11283	152.145	(+)-Norephedrine	101.001
7.734	377.18	Riboflavin	100.651
20.6973	249.201	Sterol	99.9719
1.43967	155.989	4-Nitrocatechol	98.792
1.42	196.13	6-(Hydroxymethyl)-7,8-dihydropterin	98.0322
7.87217	503.26	Verrucarin A	96.9172
14.789	118.066	L-Valine	96.8545
4.44783	130.053	L-Pipecolate	95.7433
23.9427	956.776		95.0923
17.8562	365.202	N-Acetylmuramoyl-Ala	94.7608
21.3975	279.256	(6Z,9Z,12Z)-Octadecatrienoic acid	93.9363
1.47917	130.053	L-Pipecolate	92.5262
11.8578	907.311		90.7236
26.5073	304.308	Fenpropimorph	88.3333
7.0135	142.129	Tropine	87.5002
9.94367	458.125	Amygdalin	84.0406
1.41017	236.148	(S)-Tetrahydroprotoberberine	83.8884
21.7533	399.256	Desacetoxyvindoline	79.197
8.62217	170.14	N(pi)-Methyl-L-histidine	78.7677
8.04033	186.111	N-Hydroxy-4-aminobiphenyl	78.6984
24.426	587.442	Ilexolide A	77.0416
17.659	258.303		75.9936
14.0288	936.412		75.3753
16.7412	280.267		73.9313
1.43967	197.019	D-Gluconic acid	69.1698
1.42	216.123	Atrazine	68.3704
25.4518	263.264	4-Dodecylphenol	66.9966
1.42983	244.155	Biotin amide	65.8891
19.395	320.27	Homocapsaicin	61.7247

## Sheet: raw_EtOH extract_NEG
Retention Time (RT)	m/z detected	Potential Identity	Area under the curve		QTOF (100 - 1250 m/z)
9.09783	411.078	Mollicellin C	28930.8
13.5868	623.209	Cannabisin F	4660.2
10.1338	282.099	Guanosine	3175.32
5.801	231.13	C15H20O2	2810.31
11.8215	623.209	Cannabisin D	1983.01
5.36717	427.134	C24H28O7	1954.99
26.8658	279.225	Linoleate	1767.25
13.5967	623.281	Cannabisin G	1705.47
28.7992	265.138	8-Oxodeoxycoformycin	1546.29
10.4692	312.119	C19H23NO3	1512.54
6.03767	215.143	12-Hydroxydodecanoic acid	1440.98
9.78817	409.199	Bruceine D	1417.45
6.83683	517.215	Gossypol	1266.41
5.801	185.13	10-Oxodecanoate	1236.87
5.801	168.103	Pyridoxine	1209.42
13.577	623.148	Verbascoside	1171.41
17.0202	727.22	Parishin B	1120.47
6.04767	197.121	Tacrine	964.654
16.7635	697.223		954.779
16.5168	667.197		911.981
16.7535	697.287		874.762
25.346	455.351	Ursolic acid	868.113
17.7298	193.152	4-Hexyloxyphenol	824.139
6.916	305.064	Phenazine methosulfate	803.17
5.801	141.095	4-Oxocyclohexanecarboxylate	775.154
13.5375	329.226	Cannabielsoin	761.342
35.4887	217.011	2-Hydroxy-6-oxo-6-phenylhexa-2,4-dienoate	737.971
11.782	641.24	Cannabisin E	717.799
2.40817	217.011	2-Hydroxy-6-oxo-6-phenylhexa-2,4-dienoate	711.02
5.801	393.18	Rotenone	702.429
17.7395	293.171	(9Z)-(13S)-12,13-Epoxyoctadeca-9,11-dienoic acid	694.473
17.0102	727.194	Parishin B	690.772
17.7395	249.198	Gemfibrozil	665.137
8.01183	223.09	Sinapate	641.068
5.04133	443.193	Tetracycline	619.902		UV (280-360nm)
21.064	471.339	C30H48O4	617.426
11.8413	623.148	Verbascoside	584.148
28.5723	281.247	(9Z)-Octadecenoic acid	560.88
5.82083	303.168	Nopaline	558.968
17.03	727.285		552.265
21.7845	293.171	(9Z)-(13S)-12,13-Epoxyoctadeca-9,11-dienoic acid	546.008
35.0935	293.171	(9Z)-(13S)-12,13-Epoxyoctadeca-9,11-dienoic acid	541.233
20.8175	295.235	Oleic acid methyl ester	531.844
4.07433	217.011	2-Hydroxy-6-oxo-6-phenylhexa-2,4-dienoate	519.784
3.45367	201.131	Arg-OEt	519.072
13.7645	684.256		514.699
16.803	374.239	Icaceine	504.603
11.8117	623.281	Cannabisin G	503.087
7.992	403.141	Sulfinpyrazone	490.638
35.1133	325.179	8-Hydroxycannabinol	488.311
24.3895	379.257	4,4-Difluoro-17beta-hydroxyandrost-5-en-3-one propionate	479.43
8.83133	409.199	1-Palmitoylglycerol 3-phosphate	468.789
17.7298	136.083	Anthranilate	459.684
9.15733	298.107	D-4'-Phosphopantothenate	454.566
35.0935	279.225	Stearolic acid	446.004
9.088	845.229		437.072
6.83683	553.187	Osthenol-7-O-beta-D-gentiobioside	430.6
6.27417	427.144	Pseudorhodomyrtoxin	423.571
6.83683	517.269	all-trans-Pentaprenyl diphosphate	421.82
4.40033	201.131	Arg-OEt	413.299
27.882	355.319	13-Hydroxydocosanoic acid	412.177
16.7733	697.16		404.164
5.58383	443.213	3-(O-Geranylgeranyl)-sn-glycerol 1-phosphate	404.11
16.8425	697.262		399.772
25.7998	271.224	3-Oxo-Delta4-steroid	394.643
26.234	253.212	(9Z)-Hexadecenoic acid	392.67
13.4197	563.223	Pinocembrin 7-rhamnosylglucoside	392.143
31.1775	279.16	Juvenile hormone II	377.991
16.5168	667.259	Agrimol C	376.563
5.7025	273.145	N2-Succinyl-L-arginine	361.853
3.44383	183.11	Choline phosphate	358.033
11.8117	905.297		355.741
12.8475	623.245	Forsythiaside	355.064
26.7472	369.31	5-Cholestene	353.189
9.78817	409.257	Sterol 3-beta-D-glucoside	352.758
25.7702	227.194	Tetradecanoic acid	348.071
16.4872	263.167	13-Hydroxylupanine	344.372
10.1338	282.156	Morphinone	342.975
10.1338	119.046	Phenylacetaldehyde	339.118
25.366	455.403	Betulinic acid	319.412
35.4887	374.987		316.091
20.5907	233.148	Benzoylagmatine	310.075
9.07817	861.251	Sirohydrochlorin	309.16
10.4692	297.09	D-Prephenyllactate	305.429
4.38033	183.11	Choline phosphate	286.825
17.3752	757.224	XV638	282.051
22.4655	301.169	Testololactone	281.875
16.4872	667.172	CMP-5-N-acetyl-7-N-(D-alanyl)-legionaminic acid	279.403
10.8645	445.189	Glycinoeclepin A	279.253
20.4527	311.163	16-Dehydroprogesterone	276.185
5.77133	427.184	Irbesartan	273.318
24.3992	233.184	Benzoylagmatine	273.275
10.479	312.17	N-Feruloyltyramine	267.456
15.1853	934.331		264.87
9.03867	861.237	Sirohydrochlorin	264.066
15.146	329.226	17alpha-Hydroxyprogesterone	262.69
11.8215	460.159	Azlocillin	256.707
9.07817	249.084	gamma-L-Glutamyl-L-cysteine	253.193
6.00817	377.199	Albafuran A	249.564
35.1133	311.163	16-Dehydroprogesterone	248.43
13.5967	623.341	Dauricine	248.009
8.0315	425.149	Anhydrotetracycline	247.297
20.571	504.316	Mycinamicin VIII	246.014
16.1822	207.131	Chalcone	241.465
4.13383	411.048	dIDP	239.112
21.6172	255.223	Hexadecanoic acid	234.307
9.088	233.148	Benzoylagmatine	232.172
6.02783	287.154	Testosterone	230.951
1.32217	144.032	2-Oxoglutaramate	224.607
21.5278	452.283	Delcosine	220.367
13.5967	460.159	Azlocillin	219.329
4.094	199.107	Harmalol	218.649
5.81083	195.111	2,3-Dihydroxy-p-cumate	216.643
8.92067	179.065	D-Glucose	216.448
9.581	409.199	1-Palmitoylglycerol 3-phosphate	214.735
8.25817	455.351	Betulinic acid	214.621
27.0828	241.208	1-Hexadecanol	213.574
4.094	171.111	Decanoic acid	213.474
11.8117	905.225		213.308
4.104	154.078	L-Histidine	212.753
6.78717	121.031	Nicotinamide	210.725
12.4827	298.107	D-4'-Phosphopantothenate	208.884
25.3362	455.299	Callystatin A	208.835
1.21383	146.97	Dihydroxyfumarate	208.111
7.66667	345.127	Gibberellin A3	207.572
21.6172	480.352	1-O-Hexadecyl-lyso-sn-glycero-3-phosphocholine	203.598
5.49533	425.219	Abscisic acid glucose ester	202.622
16.7243	487.368	Asiatic acid	200.529
6.916	225.123	Carnosine	196.925
9.41383	221.081	Cystathionine	193.977
15.2048	934.346		192.69
6.10683	247.113	1,2-Dihydrosantonin	189.662
10.4397	505.185	Limonoate	188.931
5.38683	427.184	Irbesartan	188.67
8.83133	407.207	Palmitoylglycerone phosphate	188.073
11.0817	503.156	Raffinose	181.695
13.7942	684.294	Viomycin	181.282
20.6895	247.166	Sterol	180.6
5.0315	443.213	3-(O-Geranylgeranyl)-sn-glycerol 1-phosphate	179.137
14.1502	637.257	Kanokoside C	175.196
6.10683	265.138	8-Oxodeoxycoformycin	174.995
9.02867	263.049	Frutinone A	174.636
7.66667	507.207	Gibberellin 2-O-beta-D-glucoside	173.919
13.4197	563.28	Musaroside	172.229
7.627	409.14	Oseltamivir phosphate	171.79
9.41383	265.091	5'-Oxoinosine	171.569
19.0908	311.223	16-Dehydroprogesterone	171.494
7.2315	427.144	Pseudorhodomyrtoxin	169.145
6.83683	615.224	3-Vinylbacteriochlorophyllide a	166.249
4.094	127.092	Naphthalene	161.182
18.755	291.214	16alpha-Hydroxysteroid	160.03
8.05133	280.098	1-Methyladenosine	159.48
6.56033	517.193	Gossypol	158.236
12.0587	460.159	Azlocillin	156.147
4.60717	411.068	Ziprasidone	155.343
6.07717	128.025	L-Pipecolate	155.251
6.82667	555.2	Ingenol 3,20-dibenzoate	151.85
7.53783	261.046	D-Mannitol 1-phosphate	151.13
11.9895	641.289	Piperazine citrate	150.995
13.913	532.292		150.915
17.1687	729.32		150.404
5.94917	425.219	Abscisic acid glucose ester	149.848
17.385	757.317		147.314
16.9515	357.217	Prednisone	147.231
14.051	513.276	Telmisartan	146.738
14.9095	729.242		145.981
10.0543	595.192	Isobutrin	144.828
9.09783	119.046	Phenylacetaldehyde	144.603
19.2587	299.168	Retinoate	144.195
13.4098	593.26	Obamegine	143.376
1.44083	128.025	L-Pipecolate	142.502
5.38683	427.144	Pseudorhodomyrtoxin	141.338
5.04133	443.244	3-(O-Geranylgeranyl)-sn-glycerol 1-phosphate	141.122
1.352	149.033	D-Ribose	139.477
7.4785	343.137	Melibiitol	138.405
18.9132	393.18	Rotenone	133.688
9.12767	231.079	Boc-Asn	133.546
9.581	277.161	Pantetheine	133.479
1.41167	133.005	(S)-Malate	133.131
13.0148	731.227		132.726
8.0315	179.065	D-Glucose	131.732
9.78817	445.189	Glycinoeclepin A	130.728
10.1338	145.025	2-Oxoglutarate	130.708
20.4918	476.294	Gentamicin C1	130.439
26.659	241.208	1-Hexadecanol	130.187
13.577	659.244	Elloramycin A	128.335
22.8407	357.217	Prednisone	127.958
13.9718	934.346		127.356
8.02167	441.13	Cortisol 21-sulfate	127.32
16.3493	221.145	(2E,6E)-Farnesol	126.843
25.7802	225.21	Pentadecanal	126.469
19.2587	205.153	Ibuprofen	125.339
10.5283	607.231	Reserpine	124.663
19.5253	293.171	(9Z)-(13S)-12,13-Epoxyoctadeca-9,11-dienoic acid	122.968
13.735	637.269	Kanokoside C	122.348
14.0115	934.346		122.221
12.0685	621.232	Allosamidine	120.453
13.6167	247.166	Sterol	118.317
20.5413	279.225	Linoleate	117.033
35.0935	321.217	Neamine	116.592
35.4983	532.995	UDP-L-Ara4O	114.418
9.088	410.637		114.016
6.31383	387.166	Secologanin	113.533
17.651	311.163	16-Dehydroprogesterone	112.471
8.06117	119.046	Phenylacetaldehyde	111.699
6.97483	427.134	Pseudorhodomyrtoxin	111.646
11.5057	249.084	gamma-L-Glutamyl-L-cysteine	111.554
20.3143	220.14	Dihydrozeatin	110.745
9.32467	427.144	Pseudorhodomyrtoxin	110.594
20.5413	471.36	Gratiogenin	109.241
22.1107	293.171	(9Z)-(13S)-12,13-Epoxyoctadeca-9,11-dienoic acid	108.963
9.07817	863.209	Cinnamtannin B1	107.382
7.992	403.199	Cortisol 21-acetate	106.049
9.07817	823.274		105.735
9.946	593.213	Pyrantel pamoate	104.591
25.425	327.291	L-2-Hydroxyphytanate	104.153
8.9305	573.175	THF-L-glutamate	104.038
13.567	721.212	Kansuinine B	103.314
9.09783	411.391	14-Demethyllanosterol	102.515
11.1802	609.197	Candesartan cilexetil	102.154
11.723	593.213	Pyrantel pamoate	100.863
19.713	247.166	Sterol	99.8662
16.4872	307.17	Ubenimex	98.3668
27.2702	357.217	Prednisone	97.7313
19.762	257.165	Cicutoxin	95.5187
10.6375	445.189	Glycinoeclepin A	95.0705
18.9132	247.166	Sterol	94.7249
13.6367	491.216	Caryoptin	94.4035
9.79817	161.035	Lichenin	94.3836
13.5473	329.288	Taxa-4(20),11(12)-dien-5alpha-yl acetate	93.2709
7.66667	221.145	(2E,6E)-Farnesol	91.7034
12.601	623.245	Forsythiaside	91.4089
4.81433	203.082	L-Tryptophan	90.1462
8.91067	535.184	Quassimarin	89.9831
6.93533	305.115	Lupinate	88.9266
9.79817	101.029	2-Oxobutanoate	88.9261
15.1853	934.257	3-Oxodecanoyl-CoA	88.8504
16.7342	309.197	Sinapine	88.0756
4.92333	279.063	Tos-Ph-CH2Cl	87.3526
4.86383	557.092		87.2516
10.9138	609.197	Candesartan cilexetil	86.5709
1.332	209.062	D-Glucarate	86.4949
13.5868	661.206	Harderoheme III	85.668
13.2218	761.245	Patellamide C	83.5886
12.2655	573.175	THF-L-glutamate	83.5839
14.16	637.343	Pimelea factor P2	82.5355
13.2612	761.245	Patellamide C	81.9502
5.3175	279.063	Tos-Ph-CH2Cl	81.5191
14.8895	729.294		81.3601
12.4923	563.28	Musaroside	79.655
17.306	487.368	Asiatic acid	74.6056
5.92	393.199	Bixin	73.1889
14.5637	934.39		73.0772
13.5375	229.151	Dodecanedioic acid	67.1224
25.573	473.261	Amastatin	62.1256
4.81433	116.044	L-Valine	61.0263
